# Supplementary material for: Gestational weight gain and foetal acidosis in vaginal and caesarean deliveries: The Japan Environment and Children’s Study
Source: PubMed Central journal article supplement (PMC7683683; doi:10.1038/s41598-020-77429-9), 2020-11-23
Supplement: 41598_2020_77429_MOESM1_ESM.pdf [file 41598_2020_77429_MOESM1_ESM.pdf]

**Gestational weight gain and foetal acidosis in vaginal and caesarean deliveries: The  
Japan Environment and Children's Study**

Tsuyoshi Murata<sup>1,2\*</sup>

Hyo Kyojuka<sup>1,2</sup>

Akiko Yamaguchi<sup>1,2</sup>

Toma Fukuda<sup>1,2</sup>

Shun Yasuda<sup>1,2</sup>

Akiko Sato<sup>1</sup>

Yuka Ogata<sup>1</sup>

Kosei Shinoki<sup>1</sup>

Mitsuaki Hosoya<sup>1,3</sup>

Seiji Yasumura<sup>1,4</sup>

Koichi Hashimoto<sup>1,3</sup>

Hidekazu Nishigori<sup>1,5</sup>

Keiya Fujimori<sup>1,2</sup>

and the Japan Environment and Children's Study (JECS) Group<sup>21</sup>

<sup>1</sup>Fukushima Regional Center for the Japan Environmental and Children's Study, 1

Hikarigaoka, Fukushima 960-1295, Japan

<sup>2</sup>Department of Obstetrics and Gynecology, Fukushima Medical University School of  
Medicine, 1 Hikarigaoka, Fukushima 960-1295, Japan

<sup>3</sup>Department of Pediatrics, Fukushima Medical University School of Medicine, 1 Hikarigaoka,  
Fukushima 960-1295, Japan

<sup>4</sup>Department of Public Health, Fukushima Medical University School of Medicine, 1  
Hikarigaoka, Fukushima 960-1295, Japan

<sup>5</sup>Fukushima Medical Center for Children and Women, Fukushima Medical University, 1  
Hikarigaoka, Fukushima 960-1295, Japan

<sup>21</sup>A comprehensive list of consortium members appears at the end of the paper.

**\*Corresponding author:** Tsuyoshi Murata

Department of Obstetrics and Gynecology, School of Medicine, Fukushima Medical  
University, 1 Hikarigaoka, Fukushima 960-1295, Japan

Tel.: +81-24-547-1290, Fax: +81-24-548-3878, E-mail: tuyoshim@fmu.ac.jp

**Supplemental Table 1.** Gestational weight gain categories stratified by pre-pregnancy BMI, in accordance with Morisaki et al. [28]

| pre-pregnancy BMI(kg/m <sup>2</sup> ) | gestational weight gain(kg) |             |           |
|---------------------------------------|-----------------------------|-------------|-----------|
|                                       | insufficient                | appropriate | excessive |
| <18.5 (extremely lean)                | <10.8                       | 10.8-13.6   | >13.6     |
| 18.5-19.9 (lean)                      | <9.5                        | 9.5-12.4    | >12.4     |
| 20.0-22.9 (normal)                    | <8.4                        | 8.4-11.4    | >11.4     |
| 23.0-24.9 (overweight)                | <5.8                        | 5.8-9.6     | >9.6      |
| 25.0< (obese)                         | <1.7                        | 1.7-6.9     | >6.9      |

BMI; body mass index
